# Supplementary material for: Color-tunable Ag-In-Zn-S quantum-dot light-emitting devices realizing green, yellow and amber emissions
Source: Royal Society of Chemistry journal article supplement (doi:10.1039/c6tc04798j), 2016-12-19
Supplement: c6tc04798j1.pdf [file c6tc04798j1.pdf]

SUPPORTING INFORMATION FOR:

# Color-tunable Ag-In-Zn-S quantum-dot light-emitting devices realizing green, yellow and amber emissions

*Dan Bi Choi,<sup>a</sup> Sohee Kim,<sup>a</sup> Hee Chang Yoon,<sup>a</sup> Minji Ko,<sup>a</sup> Heesun Yang,<sup>b</sup> and Young Rag Do<sup>a\*</sup>*

<sup>a</sup>Department of Chemistry, Kookmin University, Seoul 136-702, Republic of Korea

<sup>b</sup>Department of Materials Science and Engineering, Hongik University, Seoul 121-791, Republic of Korea

\*E-mail: yrdo@kookmin.ac.kr.

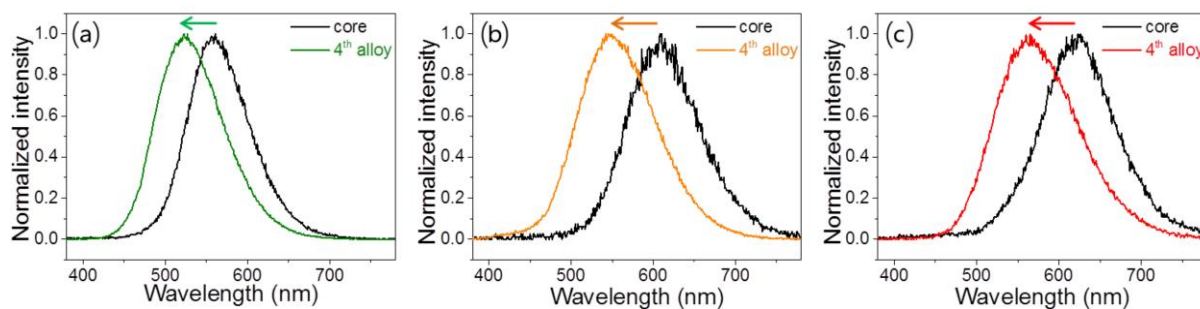

**Figure S1.** PL spectrum of (a) Green, (b) Yellow, and (c) Amber AIS core and AIZS/ZnS shelled QDs

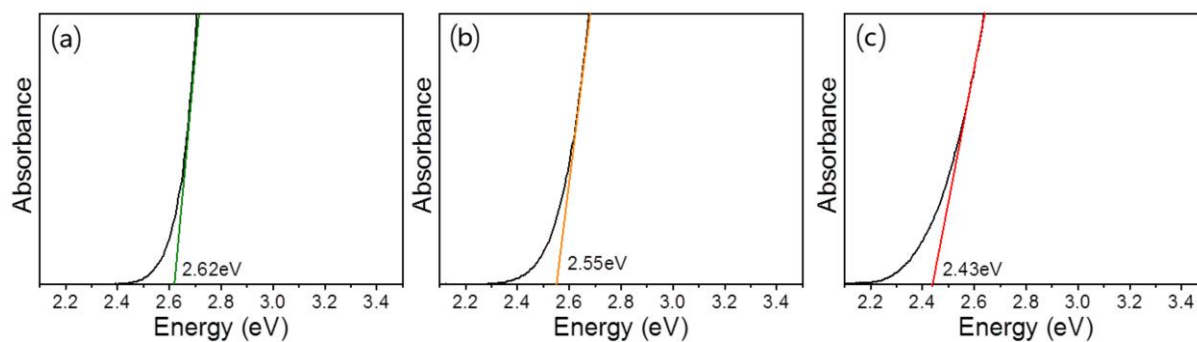

**Figure S2.** Band gap energies of (a) Green, (b) Yellow, (c) Amber QDs, determining the conduction band minimum (CBM) levels.

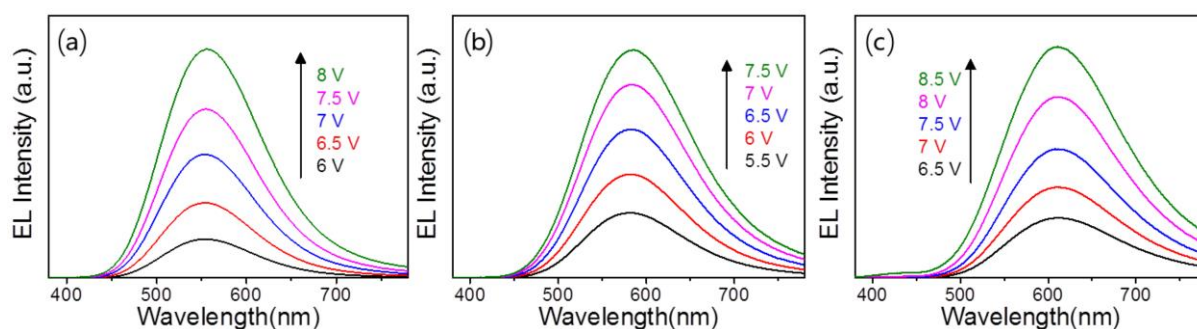

**Figure S3.** Driving voltage-dependent EL spectral evolutions of (a) Green, (b) Yellow, and (c) Amber QLEDs.
